# Supplementary material for: Relationships between GPS-derived outdoor activity space ambient heat exposure, mental health, and salivary cortisol in a longitudinal, repeated measures sample of adult Detroiters
Source: Research Square preprint supplement (doi:10.21203/rs.3.rs-9734906/v1), 2026-06-05
Supplement: Supplementary file 1 [file 48cf39605ec235c2a39825af.docx]

**Supplemental Materials**

**Table S1.** Regression modeling results for anxiety and depression symptoms

|  | Anxiety - restricted sample | | | Depression - restricted sample | | |
| --- | --- | --- | --- | --- | --- | --- |
| indep var | coef | p-value | 95%ci | coef | p-value | 95%ci |
| heat exposure | 0.007 | 0.062 | -0.000 - 0.014 | 0.007 | 0.036 | <0.001 - 0.014 |
| female | 2.846 | 0.011 | 0.645 - 5.047 | 3.208 | 0.002 | 1.176 - 5.241 |
| age | -0.096 | 0.031 | -0.184 - -0.009 | -0.105 | 0.011 | -0.186 - -0.024 |
| employed | -0.156 | 0.912 | -2.913 - 2.601 | -0.179 | 0.891 | -2.752 - 2.393 |
| married/partnered | 1.039 | 0.461 | -1.722 - 3.799 | 0.253 | 0.845 | -2.288 - 2.795 |
| feeling unsafe walking | 1.961 | <0.001 | 1.108 - 2.813 | 1.994 | <0.001 | 1.203 - 2.785 |
| May | *reference* |  |  | *reference* |  |  |
| June | -0.947 | 0.622 | -4.712 - 2.818 | -1.946 | 0.275 | -5.438 - 1.547 |
| July | 4.637 | 0.020 | 0.733 - 8.540 | 2.263 | 0.224 | -1.387 - 5.913 |
| August | 0.338 | 0.847 | -3.842 - 4.518 | -0.678 | 0.743 | -4.742 - 3.385 |
| September | 3.544 | 0.111 | -0.819 - 7.907 | 3.219 | 0.150 | -1.159 - 7.598 |
| October | 7.064 | 0.006 | 2.073 - 12.056 | 4.693 | 0.067 | -0.333 - 9.719 |
| November | 1.088 | 0.826 | -8.608 - 10.784 | 2.020 | 0.664 | -7.103 - 11.143 |
| time spent outdoors | 0.002 | 0.840 | -0.017 - 0.021 | <0.001 | 0.956 | -0.017 - 0.018 |
